# Supplementary material
Source: PubMed Central journal article supplement (PMC4372752)
Supplement: JB.02570-14_zjb999093565so1.pdf [file JB.02570-14_zjb999093565so1.pdf]

## ***Supplemental Information***

***A genome-wide analysis of PhoP~P binding to chromosomal DNA reveals several novel features of the PhoPR-mediated phosphate limitation response in Bacillus subtilis.***

Letal I. Salzberg<sup>a</sup>, Eric Botella<sup>a</sup>, Karsten Hokamp<sup>a</sup>, Haike Antelmann<sup>b</sup>, Sandra Maaß<sup>b</sup>, Dörte Becher<sup>b</sup>, David Noone<sup>a</sup> and Kevin M. Devine<sup>a#</sup>.

Smurfit Institute of Genetics, Trinity College Dublin, Dublin 2. Ireland<sup>a</sup>; Institute for Microbiology, Ernst-Moritz-Arndt-University of Greifswald, D17487 Greifswald, Germany<sup>b</sup>.

### ***Index***

- Figure S1:** PhoP~P binding to the promoters of PhoPR regulon operons *in vivo* Page 2-3.  
**Figure S2:** Sequences at the newly identified chromosomal loci to which PhoP~P binds: Page 4-6.  
**Table S1:** Oligonucleotides used in this study: Page 7-8.

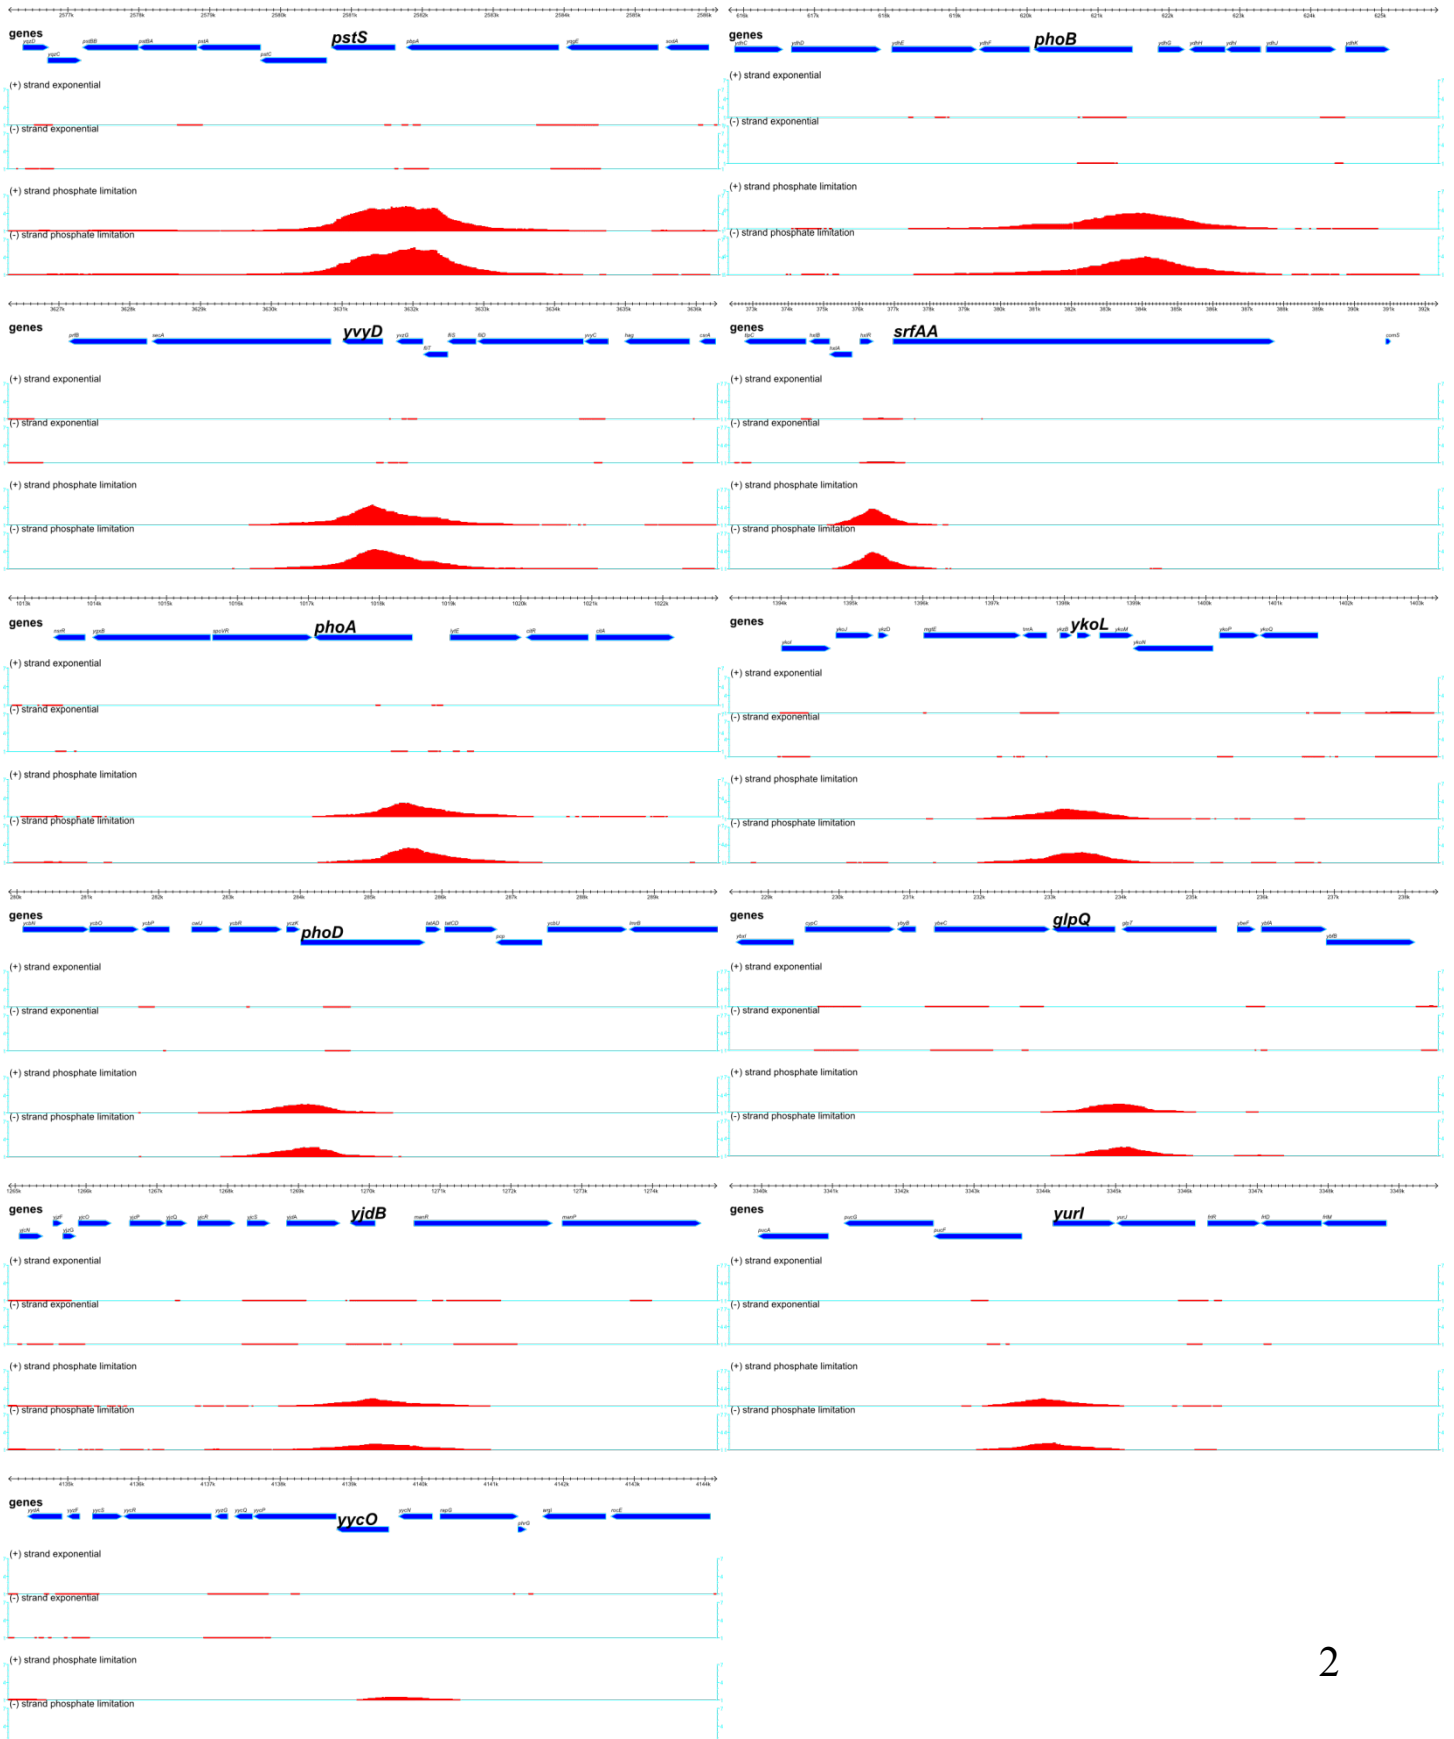

**Fig S1. PhoP~P binding to the promoters of PhoPR regulon operons *in vivo*.** Binding of PhoP~P to chromosomal DNA was determined by ChIP on chip analysis using a tiled array. Chromosomal loci are named in each panel. The genetic organization and direction of transcription of genes in the region are represented by blue arrows with the dimensions shown above in kilobases. The intensity (peak height) and extent (peak length) of PhoP~P binding is represented by the red peak whose position corresponds to that region of the chromosomal locus (blue arrows). The fold enrichment of PhoP~P binding is shown on the blue vertical axes located on the left and right of each panel. (+)/(-) strand exponential: shows PhoP~P binding on the plus (+) and minus (-) DNA strands at this locus in cells growing exponentially in LPDM; (+)/(-) strand phosphate limitation shows PhoP~P binding on the plus (+) and minus (-) DNA strands at this locus in phosphate limited cells.

***Sequences at the newly identified chromosomal loci to which PhoP~P binds:***

***Previously characterized PhoP~P Promoters (examples):***

>*tuaA* (positively regulated by PhoPR)

AAACAAATAGGACTTGTATATAAAATAGTAAAAAGAGTAT**TTAACA**ACAT**TTATCA**GAAAAAACCGTAAT**TCACAC**  
TT**CTTAACA**TACCAT**TTTACA**TCCAAT**TTAACA**TCCGCTCTGCTAAACTGACTGGC**AT**

>*tagA* (negatively regulated by PhoPR)

TTCATTCAAT**TGTAAA**AT**TGGAAC**CATATTTAAATTTAAT**TGTAAAG**GATAAT**TGTAA**TCCTT**TGTTGA**AGATTTAT  
GTTAAATATAAGG**TAG**CTTGAT

***Newly identified chromosomal loci to which PhoP~P binds in vivo:***

1. >*S1052/PipA* (positively regulated by PhoPR)

TGCTGGGCGGCTGTCCGGTAATCCAGTAGATTGTTCTC**TTGACA**AGTGTT**TTTTCA**TTTACA**AGTTCAC**CTCT  
**GGCTGCA**TCT**AAGCTCA**AGGTGTTTCGGTCTTAAT**TGTACT**CTCTCCCTTTTT**TTCTCT**CAT**TTTACT**TATATAT  
CG**GATTCA**TATAAT**CTTTACA**TTTCT**TTTAAA**ATTACCTC**A**ATAAAGCA

2. > 3' end of the *phoPR* operon \* (positively regulated by PhoPR)

**TAA**TG**TTTACA**AAAGGT**TTAACA**ATAT**CTTCA**TGCACT**GTTAAAC**CTATGCTGGTAGGATGTAGTAGAACCCCTC  
ATCCAAGGAGCCAATTTT**GACGGCGGGA**ACCTATTTGTGTTCCCG**TC**TTTTTT**TGTGTCTTCTC**

3. >*yqgSTUV*

CGCTTATCGGAGGCGCTTGGATCGCTAAAAAT**TGAATGGCTGAAAC**ATCAAAAT**TGTTAAA**ATTG**TGTAAT**TGAA**A**  
**TTGATTT**TTTGT**TGTGCT**CAGGTTAAGATTTAATTTGAT**G**T**TAA**TGAGAAT**GTTGG**GAATAGACT**G**  
**ATTTTTTTGAGCGTGC**

4. >*ygzD*

CAGTACCGCTCTGACTTTTTTTTATATTACATGTTTATTTATTTTT**CGTCA**AGGGAA**TATA**AAAAATTT**TGTCG**AAA  
AAA**AGTTAT**CTTTTT**TGTAAG**TTGTTA**AGTTC**CATTTACATA**TGTTA**AGTAT**ACTATA**CAATATA**ATC**  
AATCGA

5. >*wapA*

AAAAAT**TGTA**AAAAGGCCTATGCGGCCTTTTTT**TGTTTT**AGGTCAAT**TGACTC**TCGCTAATCCTTAAATAAGATA  
AATTTCTAGAAAAATATT**GTAATG**ATATTT**CAGTCTAG**TTAAGATTAT**TGAGT**AAATAT

6. >*comQ*

AAAGCATTGATCAACTCGATAAATACAATTATGCAAT**TGAAA**ATTT**CGTGAAAA**AGACT**TGGAAC**CAAG**TCTTTTT**  
TT**TCGTTCT**ACC**GATACA**ATA**ATGGATA**AAAG**TATTAT**ATGAT**TGTTAA**AAACGAAAAACCTG**CTGT**  
**CCTTTAAATG**TCCCATTT**AGTAAA**ATGGA

7. >*dacA*

ATAAAT**TGTTACA**AAATTA**AAACATTTGACAG**GGTCT**TGACTC**TGTC**TAT**TTTTTTTATACTGAT**TATGAT**  
**AAAATTTATA****C**TGTT**TGTCATTG**AAAA**TGTCCT**TAACGGCTTAATTATAGAT**TGAAG**AAAA**TGAAAT**ACGGAG

8. >*codV*

GGTAT **TGATTG**CAACCTGAGCGCGATT **TGTGAT**ACCATT TAAAA **GCC**CTTCCTGGGGAGGTATTAGGC  
**ATG**GAGAA**TGTTAA**GAAATTT**CGTAAAG**TTA

9. >*rapK*

AACCCCATACCTTCTCT**TGATTG**AGGAGGGTATTTTTTT**CGTTTTT**TCAAAT**GAAAAAAT****TGCAGAAAACTTTA**  
**CA**TCC**TTTACAA**ATTTTTTCAATGACT**TATGTTATGAT****TGTTTT****T**CGAGAG

10. >*pgsB*

TAAAACTTAATATTT**TGTTCA**AGAA**CTTTCAT**CCATATTT**TGTGAA**GACTTT**TGTC**AAAAAAG**AGTGAA**ACCTTA  
AATTTTTCAATTATATATACAATTTACAATTAGATTTCTTT**TGATAT**TTT**TAT****TGCTAa**CTTCGGAT**TGTTCA**  
TGATAATCTATCTA**TGTAA**ACGG

11. >*ggaAB*

AATGAGTATAGATAAGATATCAGATCTGTAAAAAATACACATCAAT**TGCAAC**GATAT**TGTC**AAAAAG**TGCTGATGA**  
TTTACATTTTTTAAAGAGC**CTTAACT**TTTATAGGAACA**TAT****TGCTAT**TAT**TGTTTA**TATT**A**ATGGAAC  
**GTA**AAAAAT**TGTCGAAATGATAA**ACAATCAGTTAAGGATTTTT**TGTTTT**TTCTA**AGTTGG**AAA

12. >*yomG\**

AATAAAACATCATGA**AGTTAT**CAATGTT**TGATT**CCAATAAAAAAT**TGATCA**CTTCA**AGTATT**TCGGGTTATGAATG  
**TTAT**GACCA**AGTAAATGAAGAGTATG**TGAT**TTTAA**CAAG**GGTAAAA**ACAGAATTAAAAATAAATGGTGAG**TGCTA**  
**TAT**TCGATTAAAAATACCGATACAAAT**TTTATAG**GAGGAT**TGTTAT****TGTTAA**ATA**AGTTTAA**AC

**Figure S2.** The sequence at the newly identified chromosomal loci to which PhoP~P binds. The sequences marked with an asterisk (*yomG* and 3' end of *phoR*) are not located at promoter regions. For illustration, the sequences at the *tuaA* and *tagA* promoters are given to show the orientation of binding sites relative to the initiation point of transcription (bases in red underlined), at promoters that are activated (*tuaA*) and repressed (*tagA*) by PhoP~P. Putative PhoP~P binding sequences in the activating (TTTACA) and repressing (TGTAAG) orientations are marked in bold underlined. Sequences in larger typeface are those designated as promoter motifs by Nicolas *et al.*, (1). Start and stop codons are shown in yellow and green respectively while the putative *phoPR* terminator is shown by inverted arrows (stem-loop) followed by a run of T bases (italicized). It is evident that only the motifs at the S1052/*pipA* locus and the 3' end of *phoPR* are in the orientation associated with promoter activation with all others in the orientation associated with repression.

## Reference

1. **Nicolas P, Mäder U, Dervyn E, Rochat T, Leduc A, Pigeonneau N, Bidnenko E, Marchadier E, Hoebeke M, Aymerich S, Becher D, Bisicchia P, Botella E, Delumeau O, Doherty G, Denham EL, Fogg MJ, Fromion V, Goelzer A, Hansen A, Härtig E, Harwood CR, Homuth G, Jarmer H, Jules M, Klipp E, Le Chat L, Lecointe F, Lewis P, Liebermeister W, March A, Mars RA, Nannapaneni P, Noone D, Pohl S, Rinn B, Rügheimer F, Sappa PK, Samson F, Schaffer M, Schwikowski B, Steil L, Stülke J, Wiegert T, Devine KM, Wilkinson AJ, van Dijl JM, Hecker M, Völker U, Bessières P, Noirot P.** 2012. Condition-dependent transcriptome reveals high-level regulatory architecture in *Bacillus subtilis*. *Science* **335**:1103-1106.

**Supplementary Table 1.** Oligonucleotides used in this study

| Primer # | Primer name           | Sequence                                                                                  |
|----------|-----------------------|-------------------------------------------------------------------------------------------|
|          | 16SBsu5'qPCR          | 5'-GTCAGCTCGTGTCTGAGATG-3'                                                                |
|          | 16SBsu3'qPCR          | 5'-CAACTGAATGCTGGCAACTAAGATC-3'                                                           |
|          | phoA chip F           | 5'-CCAATCGCCGCTGTTTCTG-3'                                                                 |
|          | phoA chip R           | 5'-TGGCCTTTTCTGTTTGTCTGAAG-3'                                                             |
|          | phoP qPCR F           | 5'-GGGAAGTAAATGCGAGAGTCAAAG-3'                                                            |
|          | phoP qPCR R           | 5'-TTACGATATGGCCTTCCATTTC-3'                                                              |
|          | phoR qPCR F           | 5'-GCGGATGAGAAAGGCATCTC-3'                                                                |
|          | phoR qPCR R           | 5'-GCCTGTACGGGTCACCAGATAC-3'                                                              |
|          | PHOP5PET              | 5'-GGAATTCCATATGAACAAGAAAATTTTAGTTG-3'                                                    |
|          | PHOP3PET              | 5'-CGGCTCGAGTTCATTCATTTTTGGCTCC-3'                                                        |
|          | tagA qPCR F           | 5'-GGTGTAGTCATGATGTCACGTTTG-3'                                                            |
|          | tagA qPCR R           | 5'-TGTTAGCAACGCCAGAAGTTC-3'                                                               |
| p40      | PhoRF(NcoI)           | 5'-ATGCCATGGCCAACAGCCTTGCCATTGATCTG-3'                                                    |
| p41      | PhoRR(XhoI)           | 5'-CCGCTCGAGGGCGGACTTTTCAGCGG-3'                                                          |
| oLS148   | polA EMSA fwd         | 5'-TCTTTACCGTGACGCTGAAACGG-3'                                                             |
| oLS149   | polA EMSA rev         | 5'-GACTGTTTCCGTCTACAAGCAC-3'                                                              |
| oLS202   | 3' phoR up fwd IF (B) | 5'-CGCGGATCCCATTAACCTACACGCCTGAGGG-3'                                                     |
| oLS203   | 3' phoR up rev IF     | 5'-CATTAGGCGGACTTTTCAGCG-3'                                                               |
| oLS204   | 3' phoR do fwd IF     | 5'-CGCTGAAAAGTCCGCCTAATGACGGCGGGAACCTATTTGTGTTCCC-3'                                      |
| oLS205   | 3' phoR do rev IF (H) | 5'-CCCAAGCTTCGTGCTGTTTTTCATCCTCAAGC-3'                                                    |
| oLS230   | phoD qPCR fwd         | 5'-GCAGCATAACCAGGCATACTATGAAC-3'                                                          |
| oLS231   | phoD qPCR rev         | 5'-TGCATATCTGGGCCATTTCG-3'                                                                |
| oLS232   | glpQ qPCR fwd         | 5'-AAGCCTGGTAAAAGTCCATCAATTAC-3'                                                          |
| oLS233   | glpQ qPCR rev         | 5'-CATCTGTCATTGACGCCATTTG-3'                                                              |
| oLS242   | 3' phoR up rev MB     | 5'ACTACATCCTACCAGCATAGGCTGCAGAGTGCACCATGGTATGAATTCACCTTATCGATC<br>ATTAGGCGGACTTTTCAGCG-3' |

|        |                    |                                                                       |
|--------|--------------------|-----------------------------------------------------------------------|
| oLS243 | 3' phoR do fwd MB  | 5'-CCTATGCTGGTAGGATGTAGTCTCGAGCCTTCATCCAAGGAGCC-3'                    |
| oLS365 | mls dif fwd        | 5'- GTGAATACCTACTTCTAGAAATATATATTATGTAAACTGATCCTTTAACTCTGGCAACCCTC-3' |
| oLS366 | mls dif rev        | 5'- CTTGCATATTAGTTTACATAATATATATTCTAGGAAGTGCCGACTGCGCAAAGACATAATCG-3' |
| oLS664 | yomG qPCR fwd      | 5'- GTCTATTGATAGCAGCGGACGTATAC-3'                                     |
| oLS665 | yomG qPCR rev      | 5'- TTTTCCGGATCTTCTGGCTTAG-3'                                         |
| oLS666 | pgsB qPCR fwd      | 5'- GATCCGGGAGCAATGAGAATTC-3'                                         |
| oLS667 | pgsB qPCR rev      | 5'- CGGCAAACCCATTAACAAAGTG-3'                                         |
| oLS670 | comQ qPCR fwd      | 5'- AAATGCAGCACTTTCCTTGTATACAG-3'                                     |
| oLS671 | comQ qPCR rev      | 5'- TGCAATCAGACTTCCACATTTTAATC-3'                                     |
| oLS672 | dacA qPCR fwd      | 5'- CGGTTCTTGCGGATCACTTG-3'                                           |
| oLS673 | dacA qPCR rev      | 5'- AGTTCGGCATGTCCATTTTCATC-3'                                        |
| oLS831 | gfp rev (BamHI)    | 5' – CGCGGATCCCTATTATTTGTATAGTTCATCCATGCC – 3'                        |
| oLS834 | S1052 qPCR fwd     | 5'- GGGAGACAGAAATGGAAAAACG-3'                                         |
| oLS835 | S1052 qPCR rev     | 5'- GGCAGACAGCTTAATTCGATAGC-3'                                        |
| oLS836 | S1052 up fwd       | 5'-AACGGGTCATAATTGAAAAGGC-3'                                          |
| oLS837 | S1052 up rev (dif) | 5'-TATATTCTAGGAAGTAGGTATTCACATCTTATCATTGCTTTATTGAGG-3'                |
| oLS838 | S1052 do fwd (dif) | 5'-TATATTATGTAAACTAATATGCAAGGGCTGCCTTTTGTATTAAAG-3'                   |
| oLS839 | S1052 do rev       | 5'-ACCAGATACACTAGAATTAGGC-3'                                          |
| oLS845 | PpipA fwd          | 5'-CCGCGGGCTTTCCAGCAAATGCTTTTCATCATTGTCCG-3'                          |
| oLS846 | PpipA rev          | 5'-GTTCTCCTTCCCACCTTTATTGGCTTTATTCATCTTATC-3'                         |
| oLS849 | S1052 fwd (SphI)   | 5' -ACATGCATGCCCTCAATAAAGCAATGATAAG- 3'                               |
| oLS850 | S1052 rev (BamHI)  | 5'-CGCGGATCCCTTAAATCAAAAAGGCAGCC-3'                                   |
| oLS870 | gfp fwd            | 5'-ATGCGTAAAGGAGAAGAACTTTTCAC-3'                                      |
| oLS872 | pipA-GFP fwd 2 (E) | 5'-CGGAATTCTTACCTCAATAAAGCAATGATAAG-3'                                |
| oLS873 | pipA-GFP rev 2     | 5'-GTGAAAAGTTCTTCTCCTTTACGCATCACAGTTAAGTAGACCGCTTCTG-3'               |
| oLS874 | pipA fwd (H)       | 5'- CCCAAGCTTTTACCTCAATAAAGCAATGATAAG-3'                              |
| oLS875 | pipA rev (B)       | 5'- CGCGGATCCCTTCTGACGGCAGAAATCAG-3'                                  |
| OE254  |                    | 5 - CGCGGATCCCGCGCATGCCGCTTAATTAACCACTTTGTTAACGCTT-3'                 |
| OE255  |                    | 5'- CCGGAAGCTTTTACATTTTAACGATATCTAGAAAAT-3'                           |
